# Supplementary material for: Nox2 in regulatory T cells promotes angiotensin II–induced cardiovascular remodeling
Source: JCI journal article supplement (doi:10.1172/jci97490), 2018-04-24
Supplement: sd1 [file 1]

# Nox2 in regulatory T cells promotes angiotensin II-induced cardiovascular remodeling

Amber Emmerson<sup>1†</sup>, Silvia Cellone Trevelin<sup>1†</sup>, Heloise Mongue-Din<sup>1†</sup>, Pablo D. Becker<sup>2</sup>, Carla Ortiz<sup>2</sup>, Lesley A. Smyth<sup>2</sup>, Qi Peng<sup>2</sup>, Raul Elgueta<sup>2</sup>, Greta Sawyer<sup>1</sup>, Aleksandar Ivetic<sup>1</sup>, Robert I. Lechler<sup>2</sup>, Giovanna Lombardi<sup>2\*</sup>, Ajay M Shah<sup>1\*</sup>

<sup>1</sup>King's College London British Heart Foundation Centre, School of Cardiovascular Medicine and Sciences, London, United Kingdom; <sup>2</sup>King's College London, Division of Transplantation Immunology & Mucosal Biology, London, United Kingdom. <sup>†</sup>These authors contributed equally to this study. \*Professor Giovanna Lombardi and Professor Ajay M Shah are co-senior authors.

**\*Corresponding authors:** Professor Ajay M. Shah, Department of Cardiology, James Black Centre, 125 Coldharbour Lane, London SE5 9NU, UK. Tel: 0044-207848-5189; Fax: 0044-207848-5193. Email: [ajay.shah@kcl.ac.uk](mailto:ajay.shah@kcl.ac.uk); **and** Professor Giovanna Lombardi, Immunoregulation Laboratory, MRC Centre for Transplantation, King's College London, 5th Floor Tower Wing, Guys' Hospital, London SE1 9RT, UK. Email: [giovanna.lombardi@kcl.ac.uk](mailto:giovanna.lombardi@kcl.ac.uk).

The authors have declared that no conflicts of interest exist.

**Running title:** Treg Nox2 and cardiovascular remodeling

**Total character count:** 56,145

This manuscript requires a Creative Commons CC-BY license.

## Supplemental Figures

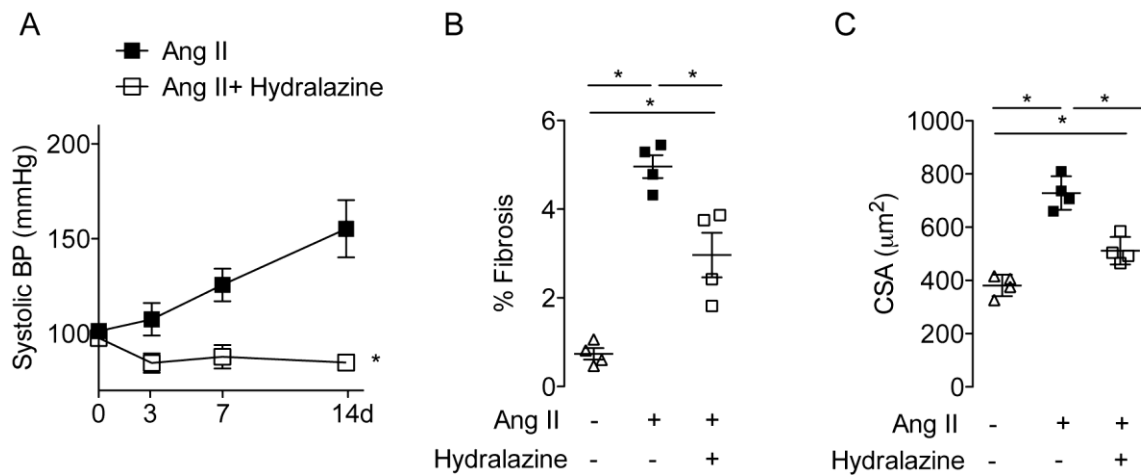

Supplemental Figure 1

**Supplemental Figure 1. Effect of hydralazine on the response to chronic Angiotensin II (Ang II) infusion.** WT mice receiving chronic Ang II infusion (1.1mg/kg/day by osmotic minipump) were treated with hydralazine (300 mg/L in drinking water) to normalise BP. (A) Systolic BP (BP) over 14 days of Ang II infusion. (B) % interstitial cardiac fibrosis in myocardial sections (Picrosirius Red staining). (C) Cardiomyocyte cross-sectional area (CSA) in transverse myocardial sections. Data are represented as mean $\pm$ SEM \* $P$ <0.05 by 2-way ANOVA (A) or 1-way ANOVA followed by Tukey's post-test (B-C); n=4 per group.

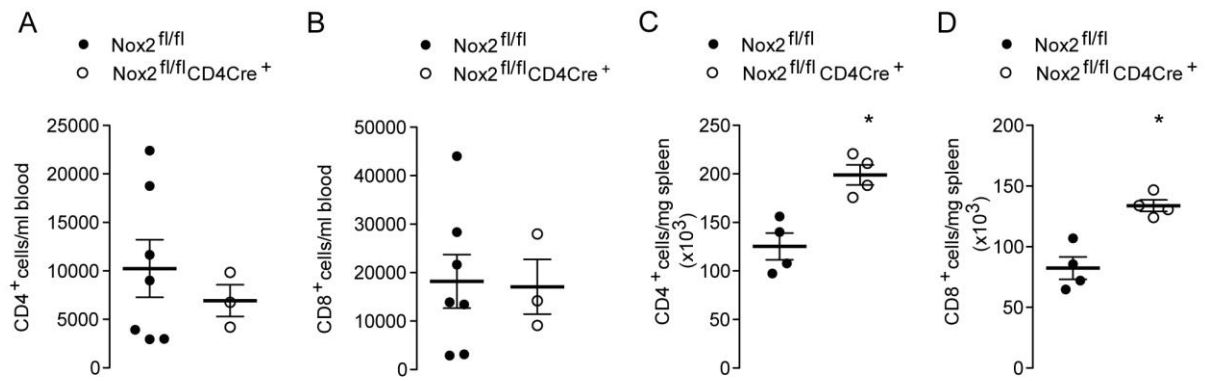

Supplemental Figure 2

**Supplemental Figure 2. Circulating and splenic CD4<sup>+</sup> and CD8<sup>+</sup> T cells in *Nox2<sup>fl/fl</sup>CD4Cre<sup>+</sup>* mice compared to *Nox2<sup>fl/fl</sup>* controls.** (A, B) Flow cytometry analyses of circulating CD4<sup>+</sup> and CD8<sup>+</sup> T cells. (C, D) Flow cytometry analyses of CD4<sup>+</sup> and CD8<sup>+</sup> T cells in spleen. Data are represented as mean ± SEM \**P* < 0.05 by unpaired t-test; *n* = 4-7 per group.

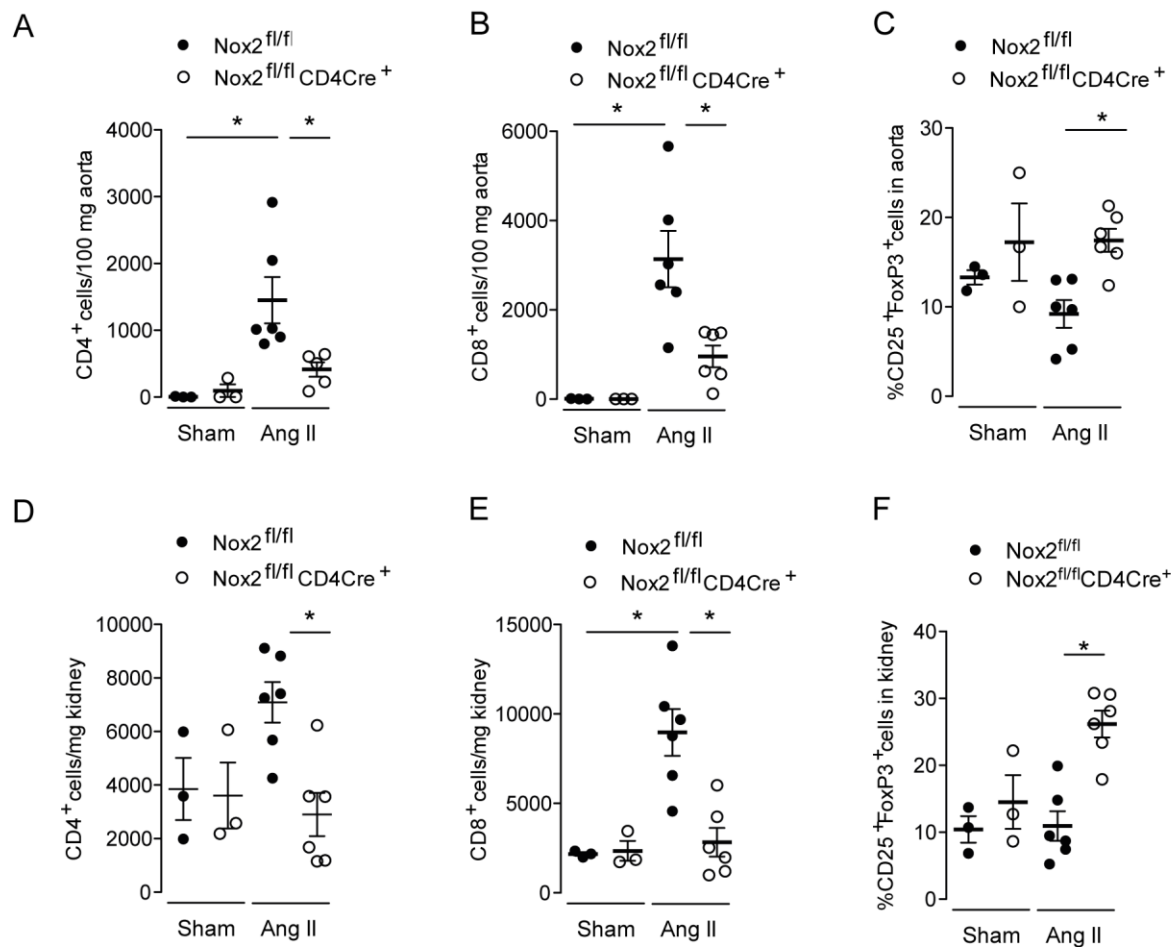

Supplemental Figure 3

**Supplemental Figure 3. Numbers of Tregs and CD4<sup>+</sup> and CD8<sup>+</sup> Teffs in aorta and kidneys of  $Nox2^{fl/fl} CD4Cre^{+}$  mice treated with AngII.**  $Nox2^{fl/fl} CD4Cre^{+}$  and  $Nox2^{fl/fl}$  controls were treated with AngII (1.1mg/kg/day) or saline (Sham) infusion. Number of CD45<sup>+</sup>TCR $\beta$ <sup>+</sup>CD4<sup>+</sup> (A, D) and CD45<sup>+</sup>TCR $\beta$ <sup>+</sup>CD8<sup>+</sup> T cells (B, E) in aorta and kidney digests by flow cytometry after 7 days of Ang II treatment. (C, F) Relative numbers of Tregs in aorta and kidney digests after 7 days of Ang II treatment. Data are represented as mean  $\pm$  SEM. \* $P < 0.05$  by 1-way ANOVA followed by Tukey's post-test; n=3-6 per group.

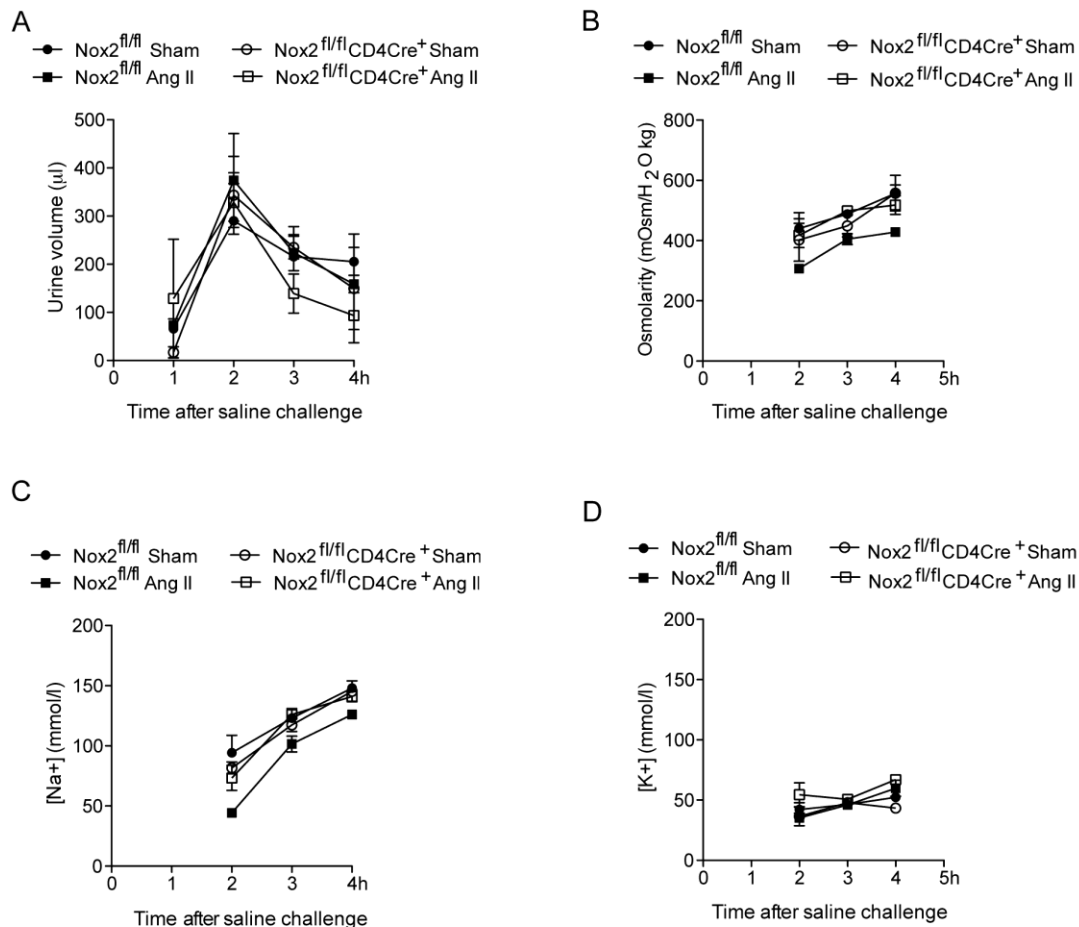

Supplemental Figure 4

**Supplemental Figure 4. Renal function is not altered in Nox2<sup>fl/fl</sup>CD4Cre<sup>+</sup> mice after AngII infusion.** Mice were treated with AngII (1.1mg/kg/day) or saline (Sham) infusion. Renal function was assessed in response to an acute saline challenge (40 ml/kg 0.9% w/vol. saline, i.p.). Animals were placed in individual metabolic chambers for 4 hours and urine was collected hourly. Data are represented as mean $\pm$ SEM. \* $P < 0.05$  by 2-way ANOVA;  $n = 3$  per group.

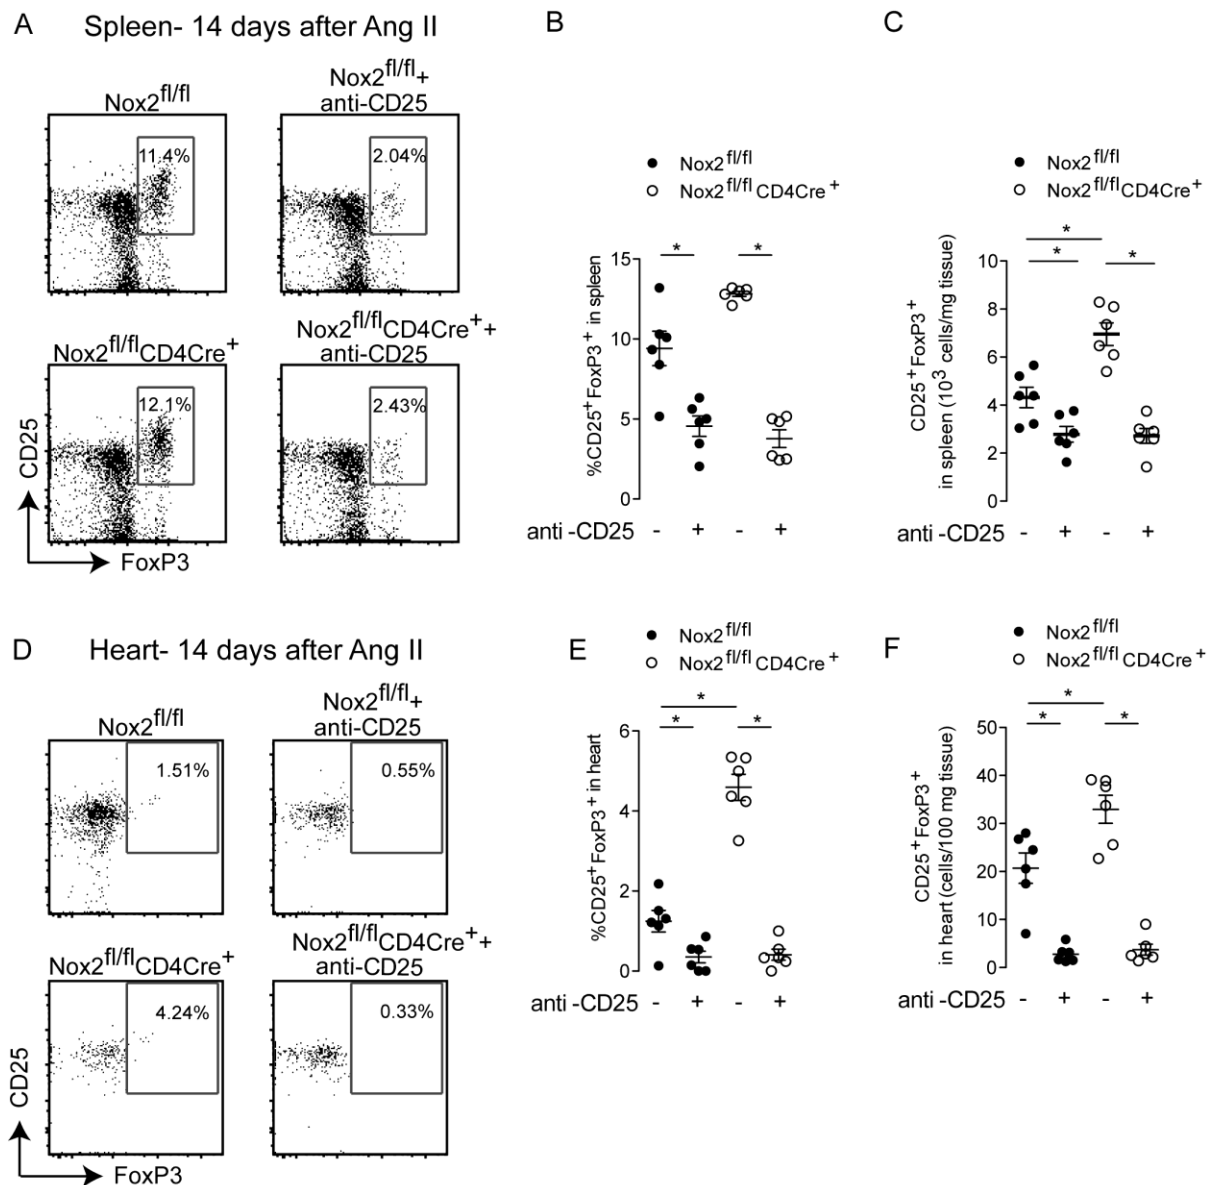

Supplemental Figure 5

**Supplemental Figure 5. Anti-CD25 Ab treatment reduces numbers of Tregs in spleen and hearts of  $Nox2^{fl/fl}CD4Cre^{+}$  and  $Nox2^{fl/fl}$  littermate controls.**  $Nox2^{fl/fl}CD4Cre^{+}$  and  $Nox2^{fl/fl}$  littermate controls mice were treated with Ang II infusion (1.1mg/kg/day). Some mice were treated with anti-CD25 antibody (Clone PC61, 500 $\mu$ g/mouse, i.p.) one day before minipump implantation. Relative and absolute numbers of  $CD45^{+}TCR^{+}CD4^{+}CD25^{+}FoxP3^{+}$  cells (Tregs) in spleen (A-C) and heart (D-F) after 14 days of Ang II treatment. Data are represented as mean $\pm$ SEM. \* $P < 0.05$  by 1-way ANOVA followed by Tukey's post-test; n=6 per group.

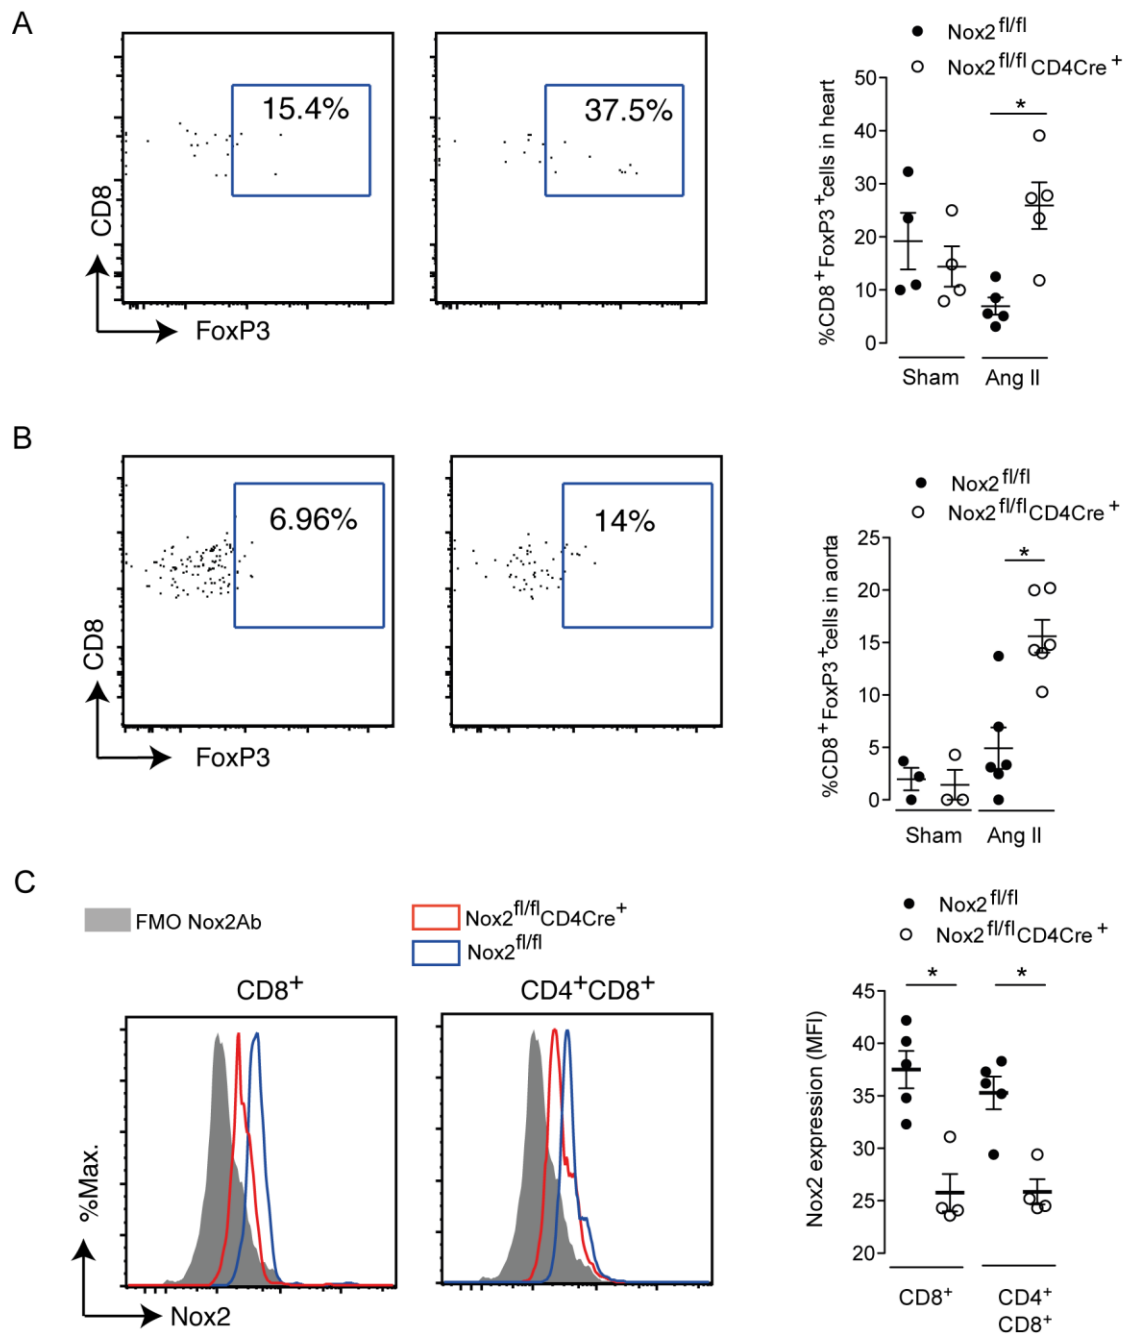

Supplemental Figure 6

**Supplemental Figure 6. *Nox2<sup>fl/fl</sup>CD4Cre<sup>+</sup>* mice have an increased proportion of CD8<sup>+</sup>FoxP3<sup>+</sup> T cells in heart and aorta after AngII treatment.** *Nox2<sup>fl/fl</sup>CD4Cre<sup>+</sup>* and *Nox2<sup>fl/fl</sup>* littermate controls were treated with AngII (1.1mg/kg/day) or saline (Sham) infusion. Relative numbers of CD8<sup>+</sup> Tregs in heart (A) and aorta (B) digests after 7 days of Ang II treatment. (C) Nox2 expression in CD8<sup>+</sup> T cells or CD4<sup>+</sup>CD8<sup>+</sup> cells from thymus. Data are represented as mean±SEM. The histogram representing FMO Nox2Ab control is the same in both panels. \**P*<0.05 by 1-way ANOVA followed by Tukey's post-test; n=3-6 per group.

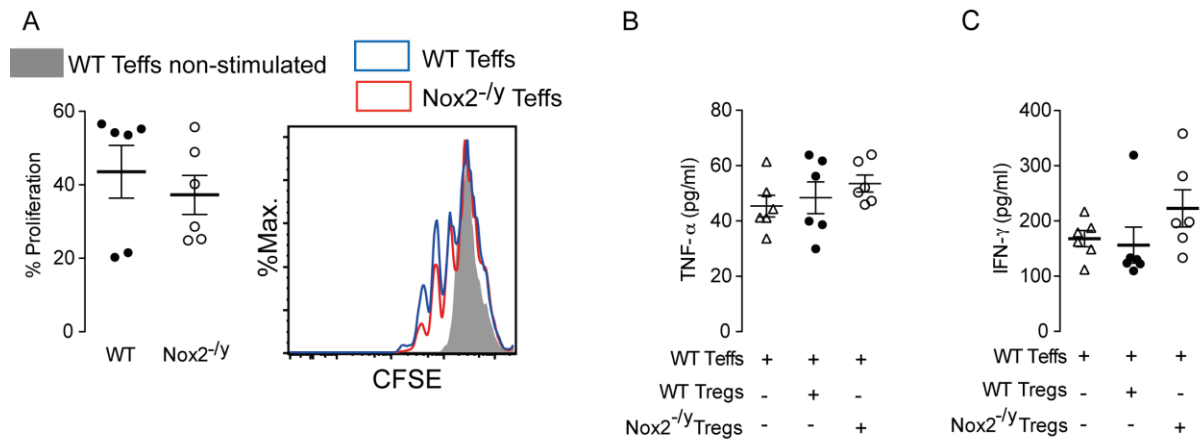

Supplemental Figure 7

**Supplemental Figure 7. Nox2 deficiency does not change the production of TNF- $\alpha$  and IFN- $\gamma$  by effector T cells.** CD4<sup>+</sup>CD25<sup>-</sup> cells (Teff) were co-cultured with Tregs (CD4<sup>+</sup>CD25<sup>+</sup> cells) purified from spleen and lymph nodes of Nox2-deficient mice (Nox2<sup>-/-</sup>) and WT controls. Cells were stimulated with antigen presenting cells and anti-CD3 $\epsilon$  antibody (4 $\mu$ g/ml) for 3 days. (A) % proliferation of Teffs; a representative histogram of WT and Nox2<sup>-/-</sup> Teffs proliferation is shown to the right. (B) Levels of TNF- $\alpha$  and IFN- $\gamma$  were determined by cytometric bead array in culture supernatants. Data are represented as mean $\pm$ SEM. Groups were compared by unpaired t-test (A) or 1-way ANOVA followed by Tukey's post-test (B, C); n=6 per group.

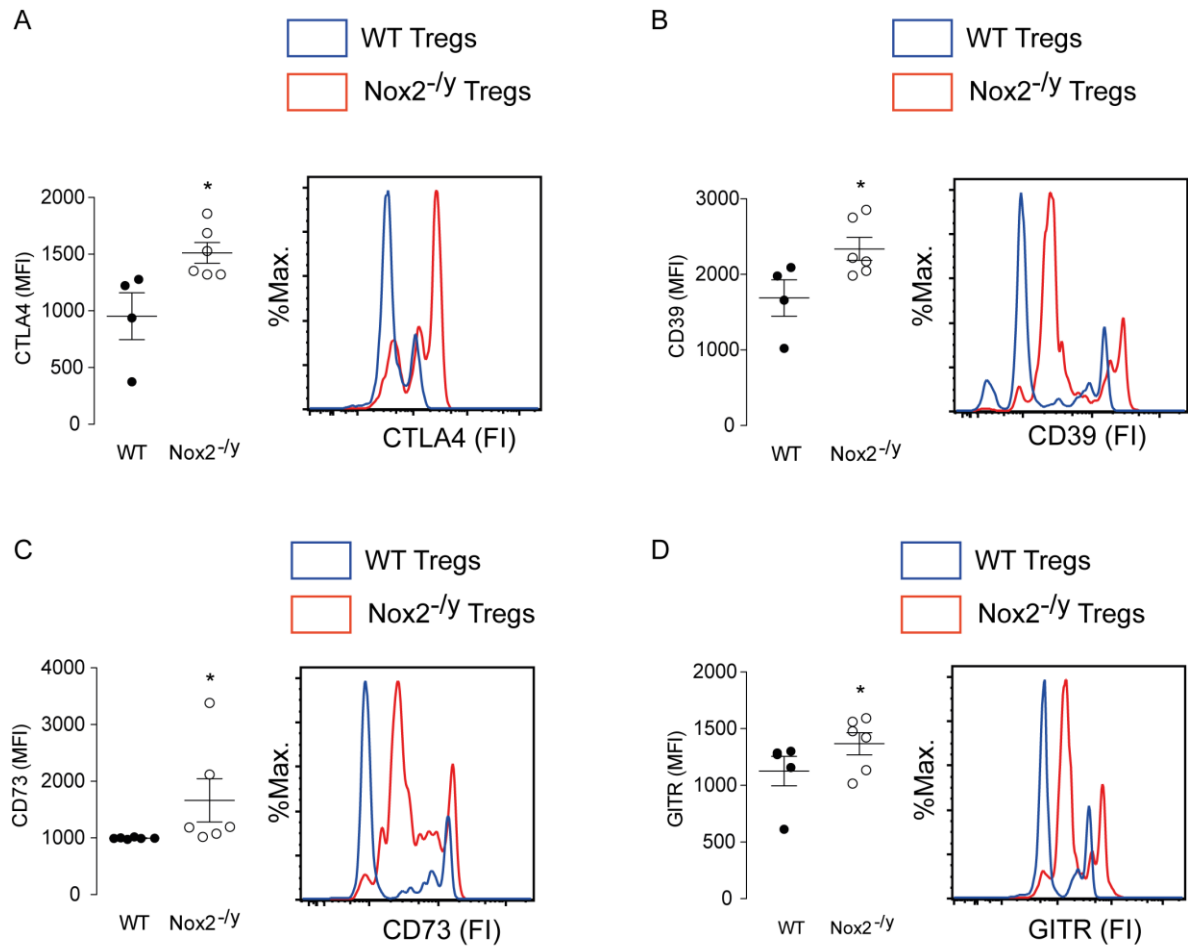

Supplemental Figure 8

**Supplemental Figure 8. Nox2 deficiency in Tregs enhances protein levels of suppressive molecules.** The protein levels of CTLA4, CD39, CD73 and GITR were quantified in purified Tregs (CD4<sup>+</sup>CD25<sup>+</sup>FoxP3<sup>+</sup> cells) by flow cytometry. MFI, mean fluorescence intensity; FI, fluorescence intensity. Data are represented as mean±SEM. \**P*<0.05 by unpaired t-test; n=4-6 per group.

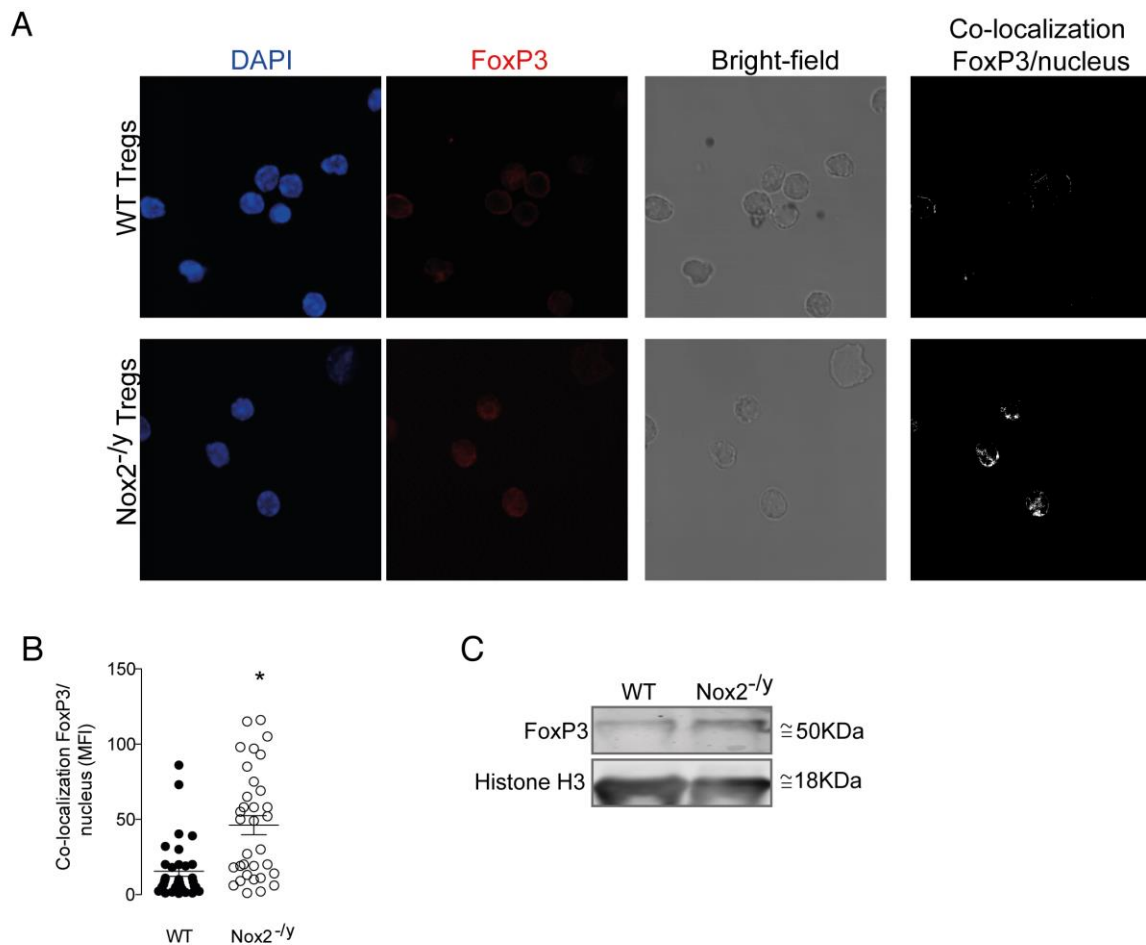

Supplemental Figure 9

**Supplemental Figure 9. Nox2 deficient Tregs have increased nuclear levels of FoxP3.** (A, B) Localization of FoxP3 in the nucleus, evaluated by confocal microscopy. Co-localized points were determined using the plug-in “co-localization highlighting” in Image J software. MFI (mean fluorescence intensity). Representative images are shown in A and mean data in B. Data are represented as mean $\pm$ SEM. \* $P<0.05$  by unpaired t-test;  $n=33$  cells per group. (C) Levels of FoxP3 in the nuclear fraction of Tregs by immunoblot. Histone H3 was used as a loading control.
